# Supplementary material for: A macrocyclic gadolinium contrast agent bearing an assembly-dissociable feature with albumin for enhanced magnetic resonance imaging and in vivo profiles
Source: Royal Society of Chemistry journal article supplement (doi:10.1039/d5tb02169c), 2026-01-01
Supplement: d5tb02169c1.pdf [file d5tb02169c1.pdf]

Supporting Information for:

**A Macrocyclic Gadolinium Contrast Agent Bearing  
Assembly-dissociable Feature with albumin for Enhanced  
Magnetic Resonance Imaging and in-vivo Profiles**

Yimin Gong,<sup>a</sup> Yichen Yao,<sup>a</sup> Zhuoying Ruan,<sup>b</sup> Nan Mei,<sup>b</sup> Dan Luo,<sup>a</sup> Xiaofeng Liu,<sup>a</sup>

Yongtai Yang,<sup>a</sup> Yu Jia,<sup>a</sup> Yannan Yang,<sup>c</sup> Bo Yin,<sup>b,d,\*</sup> Yaming Zhou,<sup>a</sup> Yun Ling<sup>a,\*</sup>

<sup>a</sup> Department of Chemistry, Fudan University, Shanghai 200433, China

<sup>b</sup> Department of Radiology, Huashan Hospital North, Fudan University, Shanghai,  
201907, China

<sup>c</sup> South Australian immunoGENomics Cancer Institute, Faculty of Health and Medical  
Sciences, The University of Adelaide, Adelaide, South Australia 5005, Australia

<sup>d</sup> National Key Laboratory of Advanced Drug Formulations for Overcoming Delivery  
Barriers, Fudan University, Shanghai, 201203, China

\*E-mail: [yunling@fudan.edu.cn](mailto:yunling@fudan.edu.cn) and [yinbo@fudan.edu.cn](mailto:yinbo@fudan.edu.cn)

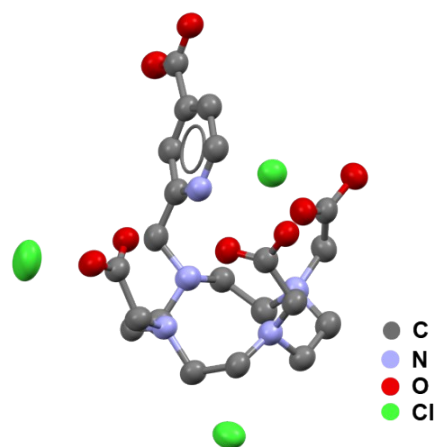

**Figure S1.** Single crystal X-ray diffraction study of the ligand.

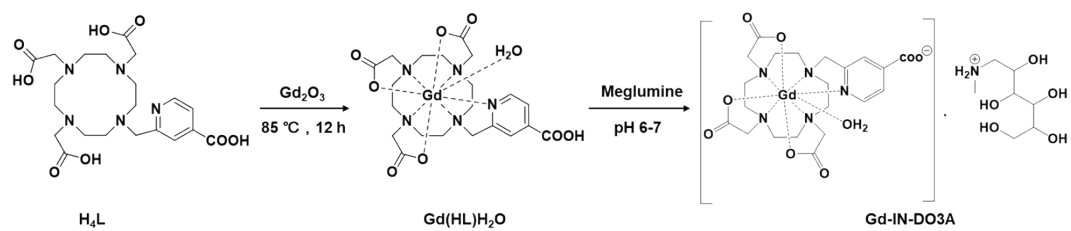

**Figure S2.** Synthetic route of Gd-IN-DO3A.

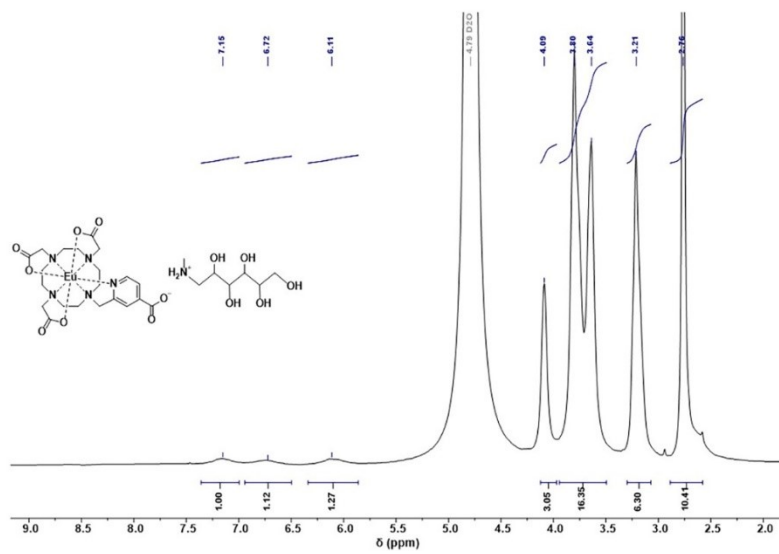

**Figure S3.**  $^1\text{H}$  NMR spectrum of Eu-IN-DO3A (D<sub>2</sub>O, 400 MHz).

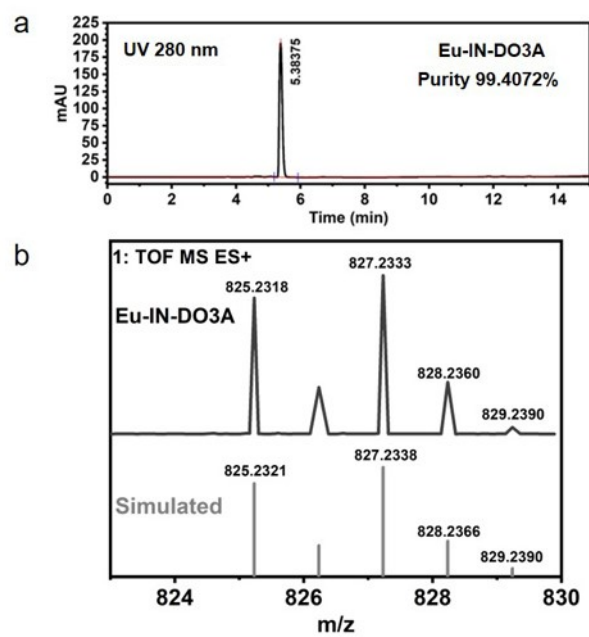

**Figure S4.** (a) HPLC chromatogram analysis and (b) ESI-MS spectrum of Eu-IN-DO3A.

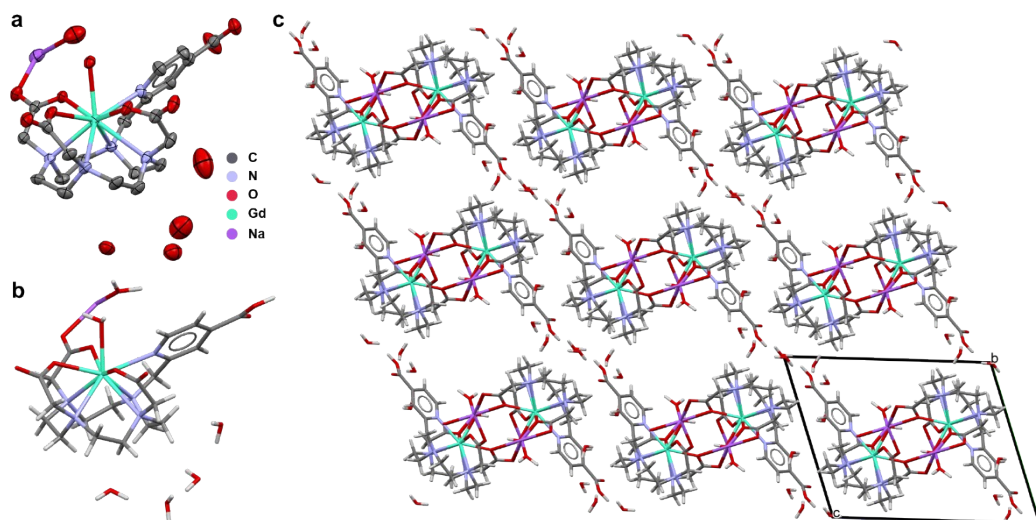

**Figure S5.** Single crystal X-ray diffraction results for  $[\text{Gd}(\text{L})\text{H}_2\text{O}]\text{Na}(7\text{H}_2\text{O})$ . (a) The structural motif is shown at a 50% ellipsoid probability (hydrogen atoms are omitted for clarity). (b) The structure with one coordinated water molecule as well as water molecules in the secondary sphere of Gd. (c) the packing structure along  $a$  axis.

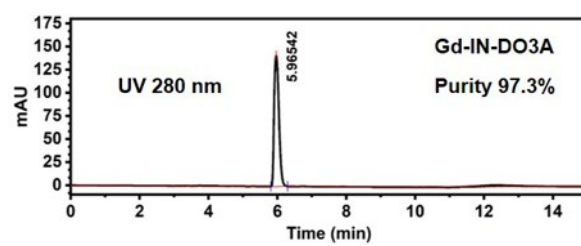

**Figure S6.** HPLC chromatogram of Gd-IN-DO3A.

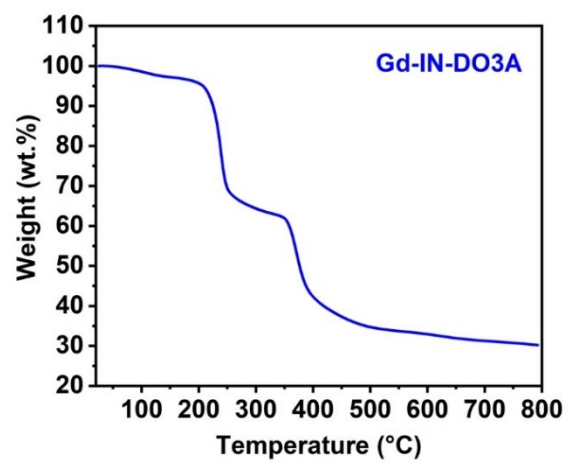

**Figure S7.** TGA of Gd-IN-DO3A under nitrogen flow.



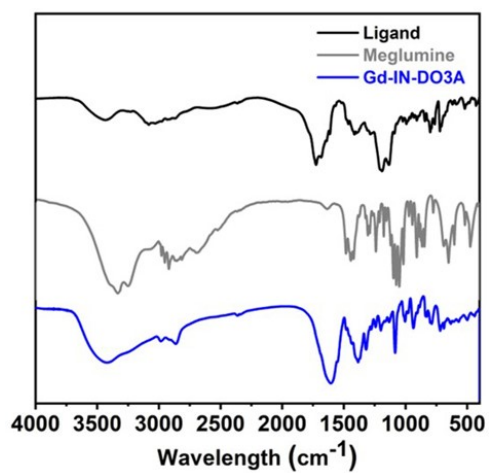

**Figure S8.** FTIR spectra of the Ligand, meglumine, and as-prepared Gd-IN-DO3A.

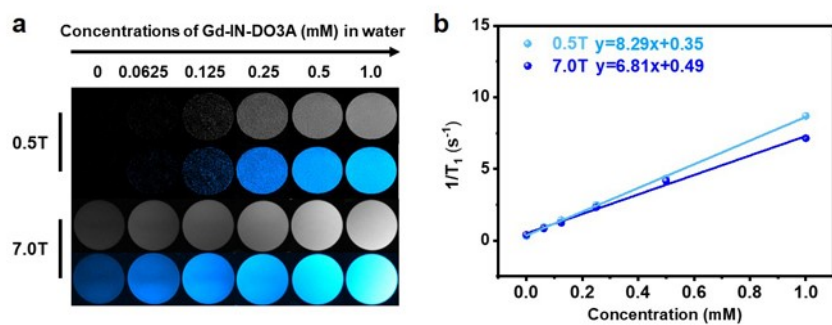

**Figure S9.** (a)  $T_1$ -weighted and color-mapped MR images of the concentration of Gd-IN-DO3A in water at 0.5 T and 7.0 T, respectively. (b) Corresponding relaxivity  $r_1$  ( $1/T_1$ ) versus the concentration of Gd-IN-DO3A.

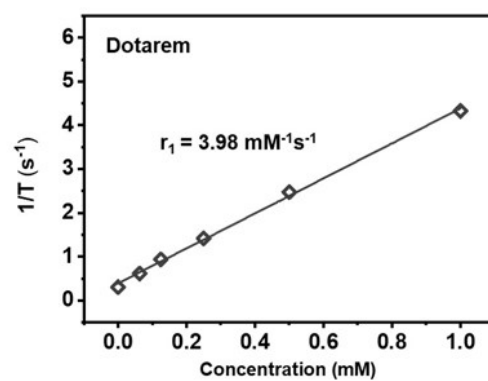

**Figure S10.** Relaxivity  $r_1$  ( $1/T_1$ ) versus the concentration of Dotarem in water at 0.5 T (32 °C).

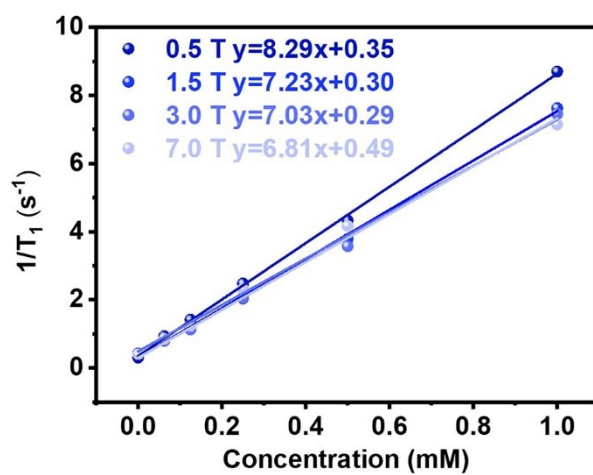

**Figure S11.** Relaxivity  $r_1$  ( $1/T_1$ ) versus the concentration of Gd-IN-DO3A in water at 0.5 T (32 °C), 1.5 T, 3.0 T, and 7.0 T (25 °C), respectively.

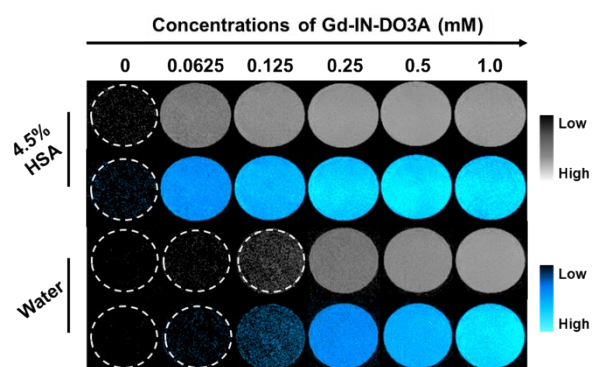

**Figure S12.** T<sub>1</sub>-weighted and color-mapped MR images for the concentration of Gd-IN-DO3A in water and 4.5% HSA solution at 0.5 T (32 °C), respectively.

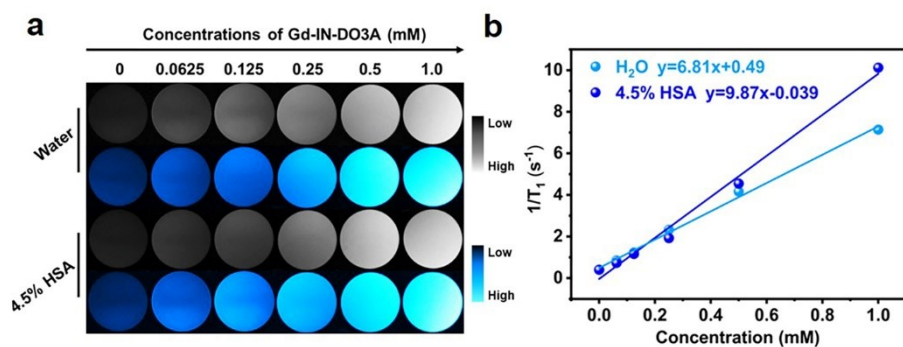

**Figure S13.** (a) T<sub>1</sub>-weighted and color-mapped MR images for the concentration of Gd-IN-DO3A in water and 4.5% HSA solution at 7.0 T, respectively. (b) Corresponding relaxivity  $r_1$  ( $1/T_1$ ) versus the concentrations of Gd-IN-DO3A.

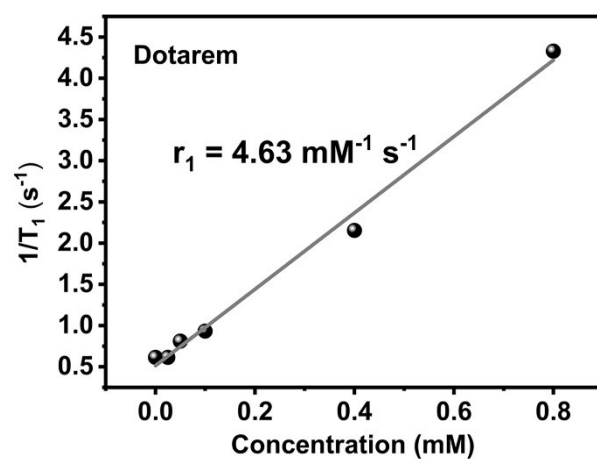

**Figure S14.** Relaxivity  $r_1$  ( $1/T_1$ ) versus the concentration of Dotarem in 4.5% HSA at 0.5 T (32 °C).

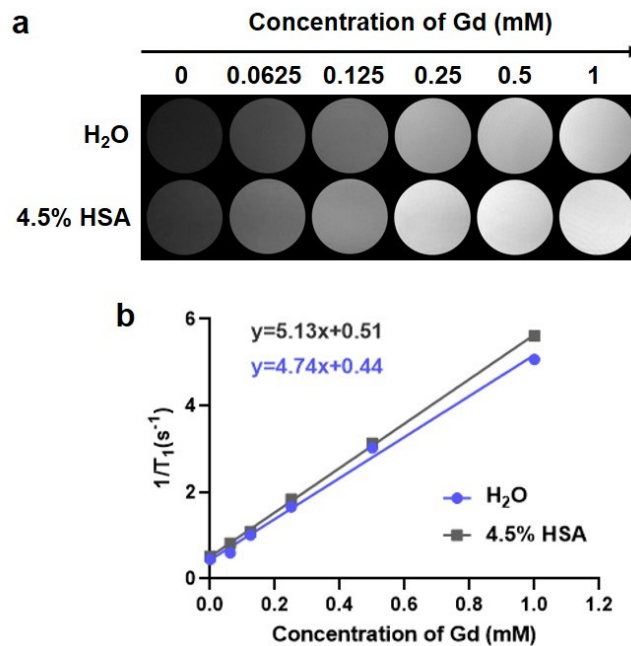

**Figure S15.** (a)  $T_1$ -weighted and color-mapped MR images for various concentrations of Gd-BOPTA in water and 4.5% HSA solution at 7.0 T, respectively. (b) Corresponding relaxivity  $r_1$  ( $1/T_1$ ) versus different concentrations of Gd-BOPTA.



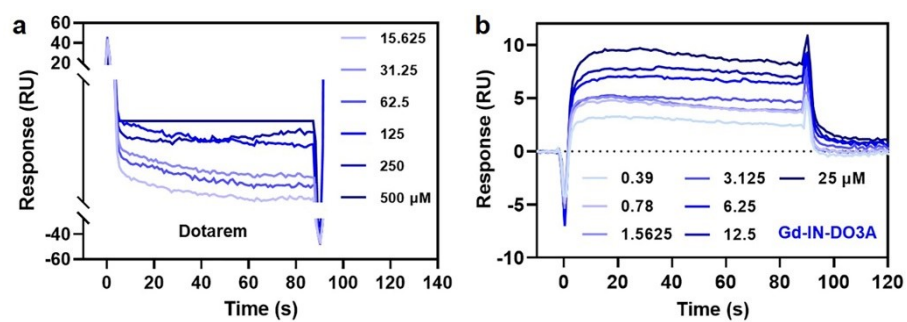

**Figure S16.** Affinity curves of Dotarem (a) and Gd-IN-DO3A (b) for HSA.

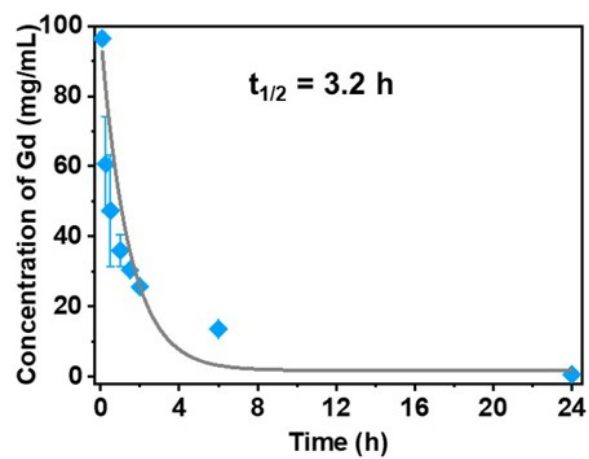

**Figure S17.** The time-concentration curve in mouse blood after a single dose intravenous administration of 0.1 mmol Gd/kg.

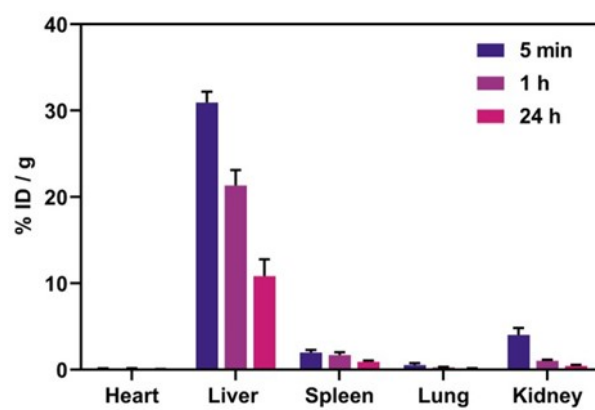

**Figure S18.** Biodistribution of Gd-IN-DO3A in normal BALB/c mice at 5 min, 1 h, and 24 h after injection at a dose of 0.1 mmol Gd/kg.

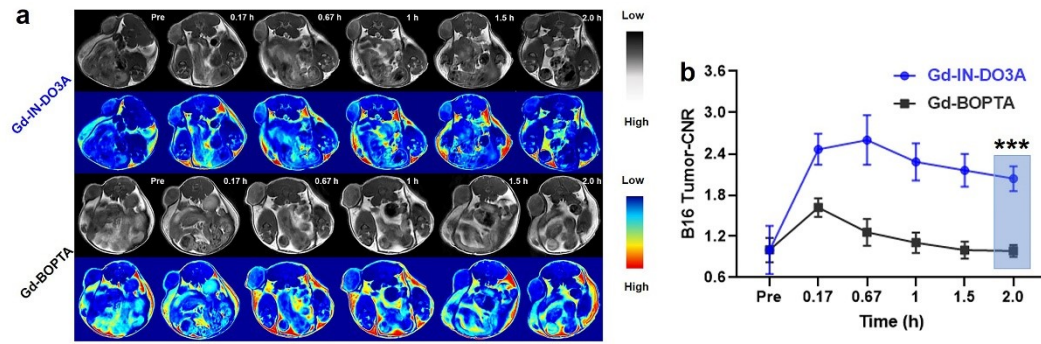

**Figure S19.** Axial T<sub>1</sub>-weighted images of B16 tumor-bearing mouse acquired at 3.0 T (a) and the corresponding plots of the contrast-to-noise ratio (CNR) versus time for the above images. (Data are shown as means  $\pm$  SD,  $n = 3$ , \*\*\* $p < 0.001$ .)

**Table S1.** The parameters of crystalline structure for the ligand.

| Parameter                                                                                                          | ligand                                                                             |
|--------------------------------------------------------------------------------------------------------------------|------------------------------------------------------------------------------------|
| <b>Empirical formula</b>                                                                                           | C <sub>23</sub> H <sub>47.5</sub> Cl <sub>2.5</sub> N <sub>5</sub> O <sub>17</sub> |
| <b>Formula weight</b>                                                                                              | 754.78                                                                             |
| <b>Crystal system</b>                                                                                              | triclinic                                                                          |
| <b>Space group</b>                                                                                                 | P-1                                                                                |
| <i>a</i> (Å)                                                                                                       | 10.6702(8)                                                                         |
| <i>b</i> (Å)                                                                                                       | 10.6772(8)                                                                         |
| <i>c</i> (Å)                                                                                                       | 15.2565(12)                                                                        |
| $\beta$ (°)                                                                                                        | 83.071(3)                                                                          |
| <i>V</i> (Å <sup>3</sup> )                                                                                         | 1715.6(2)                                                                          |
| <i>Z</i>                                                                                                           | 2                                                                                  |
| <i>D<sub>c</sub></i> (g/cm <sup>3</sup> )                                                                          | 1.461                                                                              |
| $\mu$ (mm <sup>-1</sup> )                                                                                          | 1.858                                                                              |
| <i>F</i> (000)                                                                                                     | 798.0                                                                              |
| <b>GOF on <i>F</i><sup>2</sup></b>                                                                                 | 1.103                                                                              |
| <i>R</i> <sub>1</sub> <sup>[a]</sup> , <i>wR</i> <sub>2</sub> <sup>[b]</sup> [ <i>I</i> > 2 $\sigma$ ( <i>I</i> )] | <i>R</i> <sub>1</sub> = 0.0862, <i>wR</i> <sub>2</sub> = 0.2536                    |
| $\Delta\rho_{\max}/\Delta\rho_{\min}$ (e/Å <sup>3</sup> )                                                          | 0.47/-0.69                                                                         |
| <b>CCDC</b>                                                                                                        | 2515628                                                                            |

[a]  $R_1 = \Sigma||F_0| - |F_c||/\Sigma|F_0|$ . [b]  $wR_2 = [\Sigma w(F_0^2 - F_c^2)^2/\Sigma w(F_0^2)^2]^{1/2}$

**Table S2.** The parameters of crystalline structure for [NaGd(L)H<sub>2</sub>O](7H<sub>2</sub>O).

| Parameter                                                                                                          | ligand                                                             |
|--------------------------------------------------------------------------------------------------------------------|--------------------------------------------------------------------|
| <b>Empirical formula</b>                                                                                           | C <sub>21</sub> H <sub>42</sub> GdN <sub>5</sub> NaO <sub>17</sub> |
| <b>Formula weight</b>                                                                                              | 816.83                                                             |
| <b>Crystal system</b>                                                                                              | triclinic                                                          |
| <b>Space group</b>                                                                                                 | P-1                                                                |
| <i>a</i> (Å)                                                                                                       | 9.1685(19)                                                         |
| <i>b</i> (Å)                                                                                                       | 12.758(3)                                                          |
| <i>c</i> (Å)                                                                                                       | 15.540(3)                                                          |
| <i>β</i> (°)                                                                                                       | 85.709(7)                                                          |
| <i>V</i> (Å <sup>3</sup> )                                                                                         | 1694.2(6)                                                          |
| <i>Z</i>                                                                                                           | 2                                                                  |
| <i>D<sub>c</sub></i> (g/cm <sup>3</sup> )                                                                          | 1.601                                                              |
| <i>μ</i> (mm <sup>-1</sup> )                                                                                       | 2.046                                                              |
| <i>F</i> (000)                                                                                                     | 828.0                                                              |
| <b>GOF on <i>F</i><sup>2</sup></b>                                                                                 | 0.962                                                              |
| <i>R</i> <sub>1</sub> <sup>[a]</sup> , <i>wR</i> <sub>2</sub> <sup>[b]</sup> [ <i>I</i> > 2 <i>σ</i> ( <i>I</i> )] | <i>R</i> <sub>1</sub> = 0.0469, <i>wR</i> <sub>2</sub> = 0.0968    |
| <i>Δρ</i> <sub>max</sub> / <i>Δρ</i> <sub>min</sub> (e/Å <sup>3</sup> )                                            | 1.70/-0.94                                                         |
| <b>CCDC</b>                                                                                                        | 2515627                                                            |

[a]  $R_1 = \Sigma ||F_0| - |F_c|| / \Sigma |F_0|$ . [b]  $wR_2 = [\Sigma w(F_0^2 - F_c^2)^2 / \Sigma w(F_0^2)^2]^{1/2}$

**Table S3.** Major pharmacokinetic parameters derived by two-compartmental modeling after intravenous administration of Gd-IN-DO3A complex (0.1 mmol Gd /kg) in healthy mice.

| Parameter          | Unit   | Value   |
|--------------------|--------|---------|
| $AUC_{(0-t)}$      | mg/L·h | 403.057 |
| $AUC_{(0-\infty)}$ | mg/L·h | 404.490 |
| $t_{1/2z}$         | h      | 3.229   |
| $T_{max}$          | h      | 0.083   |
| $CL_z$             | L/h/kg | 0.039   |
| $C_{max}$          | mg/L   | 113.450 |

$AUC_{(0-t)}$  and  $AUC_{(0-\infty)}$  area under the curve.  $t_{1/2z}$ : elimination half-life.  $T_{max}$ : peak time.

$CL_z$ : clearance.  $C_{max}$ : peak concentration.
